# Supplementary material for: Long COVID: Lung Pathophysiology and its Relationship with Cognitive Dysfunction
Source: Research Square preprint supplement (doi:10.21203/rs.3.rs-7464124/v1), 2025-10-08
Supplement: Supplementary file 1 [file 9547901e62460ea40359b9db.docx]

**SUPPLEMENTAL INFORMATION**

Table S1. PROMIS and NIH Toolbox Measures

| Metric | Long COVID  (n = 12) | P value |
| --- | --- | --- |
| *PROMIS* |  |  |
| Cognitive Function | 33.9 ± 5.9 | **<0.001** |
| Fatigue | 62.7 ± 6.2 | **<0.001** |
| Anxiety | 58.2 ± 7.8 | **0.005** |
| Depression | 56.8 ± 5.6 | **0.001** |
| Sleep Disturbance | 59.9 ± 6.6 | **<0.001** |
| Dyspnea Severity | 47.2 ± 9.5 | 0.33 |
| Pain Interference | 53.9 ± 11.8 | 0.28 |
| *NIHTB-CB* |  |  |
| Total Cognition Composite | 55.5 ± 9.4 | 0.08 |
| Executive Function | 49.8 ± 10.2 | 0.95 |
| Processing Speed | 52.5 ± 6.3 | 0.23 |
| Language | 52.8 ± 5.7 | 0.14 |
| Memory | 57.0 ± 7.3 | **0.01** |

Data are presented as mean ± standard deviation. P-value from one sample t-test based on an internal reference distribution. NIHTB-CB only includes 11/12 participants.

*Abbreviations: PROMIS=Patient-Reported Outcomes Measurement Information System; NIHTB-CB=National Institute of Health Toolbox Cognition Battery*

Table S2. Correlation coefficients between pulmonary gas exchange and brain volume with and without controlling for age. No significant correlations were found for RBC:gas and mem:gas and regional brain volumes

|  |  | Frontal Lobe | | Parietal Lobe | | Temporal Lobe | | Occipital Lobe | |
| --- | --- | --- | --- | --- | --- | --- | --- | --- | --- |
|  |  | **GM** | **WM** | **GM** | **WM** | **GM** | **WM** | **GM** | **WM** |
| RBC:mem | Non-adj. *ρ* | **0.59** | 0.42 | **0.67** | **0.64** | *0.43* | 0.43 | 0.19 | 0.34 |
| Age-adj. *ρ* | 0.19 | 0.13 | 0.39 | 0.41 | 0.25 | 0.36 | 0.22 | 0.23 |

Data are presented as spearman correlation coefficients, with age-adj. values calculated using spearman partial correlation with age has a covariate. p ≤ 0.05 = **Bold**, 0.05 < p ≤ 0.1 = *Italics*

*Abbreviations: GM=gray matter; WM=white matter; RBC=red blood cell; Mem=membrane*
